# Supplementary material for: Kinetics and mechanism of water substitution in the low-spin Fe(ii) complex of 4-octasulfophenylpyrazinoporphyrazineElectronic supplementary information (ESI) available: A total of ten figures including 1H NMR spectra, kinetic traces, Eyring plots and plots of kobs as a function of pressure. See http://www.rsc.org/suppdata/dt/b3/b311695f/
Source: Royal Society of Chemistry journal article supplement (doi:10.1039/b311695f), 2004-01-01
Supplement: b311695f.doc [file b311695f.doc]

# **Supporting Information**

# Kinetics and mechanism of water substitution in the low spin Fe(II) complex

# of 4-octasulfophenylpyrazinoporphyrazine

###### Evgeny V. Kudrik, Rudi van Eldik and Sergei V. Makarov

**Figure S1.** 1H NMR spectrum of (Py)2FePyzPz(PhSO3-)8 in the presence of Py in D2O. Experimental conditions: [(Py)2FePyzPz(PhSO3-)8] = 1.2 x 10-3 M, [Py] = 0.21 M.

**Figure S2.** Scatchard plots for the reaction of (H2O)2FePyzPz(PhSO3-)8 with Py as a function of temperature. Experimental conditions: pH = 12.4 (NaOH), 25 0C - open circles, 30 0C – open triangles, 35 0C – filled triangles.

**Figure S3.** Typical kinetic trace for the interaction of (H2O)2FePyzPz(PhSO3-)8 (2 x 10-5 M) with Py (0.07 M). Experimental conditions:  = 645 nm, pH = 7 (0.1 M TRIS buffer), 25 0C.

**Figure S4.** Van ‘t Hoff plots for the reaction of (H2O)2FePyzPz(PhSO3-)8 (2 x 10-5 M) with Py (triangles) and 4-CNPy (squares) at 25 0C and pH = 7 (0.1 M TRIS buffer).

**Figure S5.** Plot of lnkobs vs. pressure for the reaction of (H2O)2FePyzPz(PhSO3-)8 (2 x 10-5 M) with 4-CNPy (0.09 M) at 25 0C and pH = 7 (0.1 M TRIS buffer).

**Figure S6**. Eyring plot for the reaction of (H2O)2FePyzPz(PhSO3-)8 (2.25 10-5 M) with 4-CN Py (kb). Experimental conditions:  = 641 nm, pH = 6.8.

**Figure S7**. Eyring plot for the reaction of (H2O)2FePyzPz(PhSO3-)8 (2.25 10-5 M) with Pyz (0.07 M) at pH = 5.0 (ka).

**Figure S8**. Eyring plot for reaction of (H2O)(Pyz)FePyzPz(PhSO3-)8 (2.25 10-5 M) with Pyz (0.07 M) at pH = 5.0 (ka’).

**Figure S9**. lnkobs vs. pressure for the reaction of (H2O)2FePyzPz(PhSO3-)8 (2.25 10-5 M) with Py (0.084 M) at 25 0C and pH = 7 (0.1M TRIS buffer).

**Figure S10**. Eyring plot for the reaction of (H2O)(Py)FePyzPz(PhSO3-)8 (2.25 10-5 M) with Py at pH = 7 (0.1M TRIS buffer) (kb’).

# Figure S1


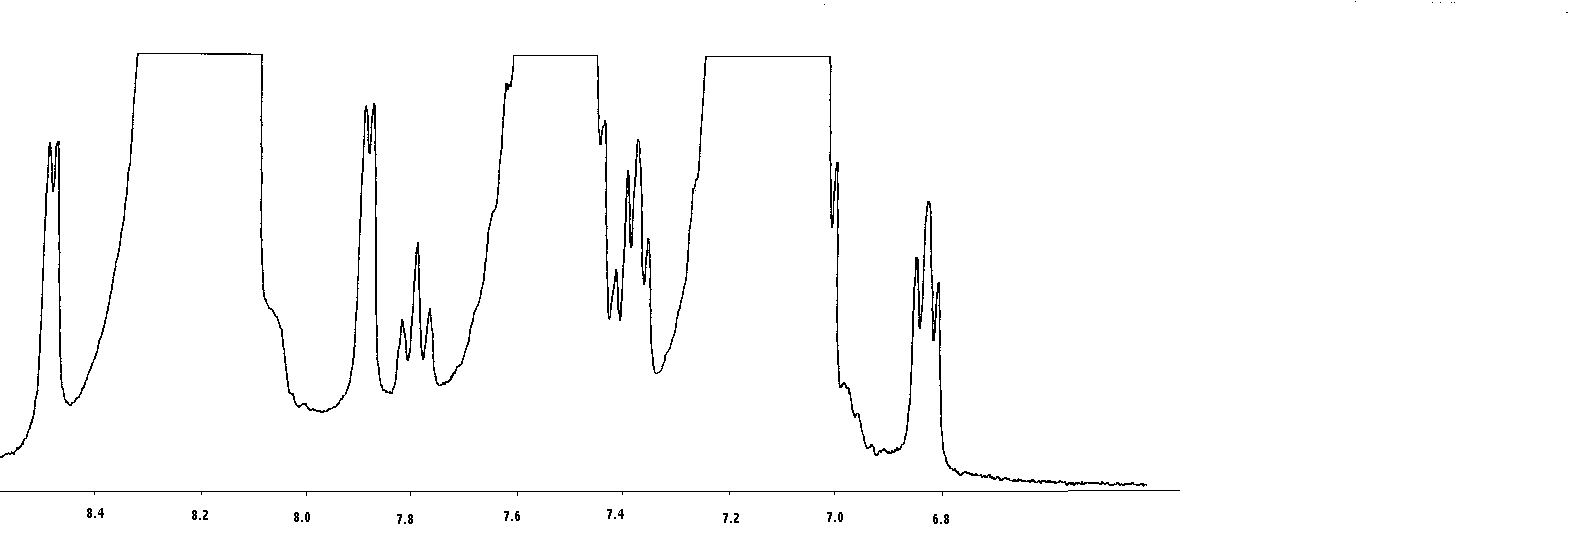


# /ppm

# Figure S2

# Figure S3


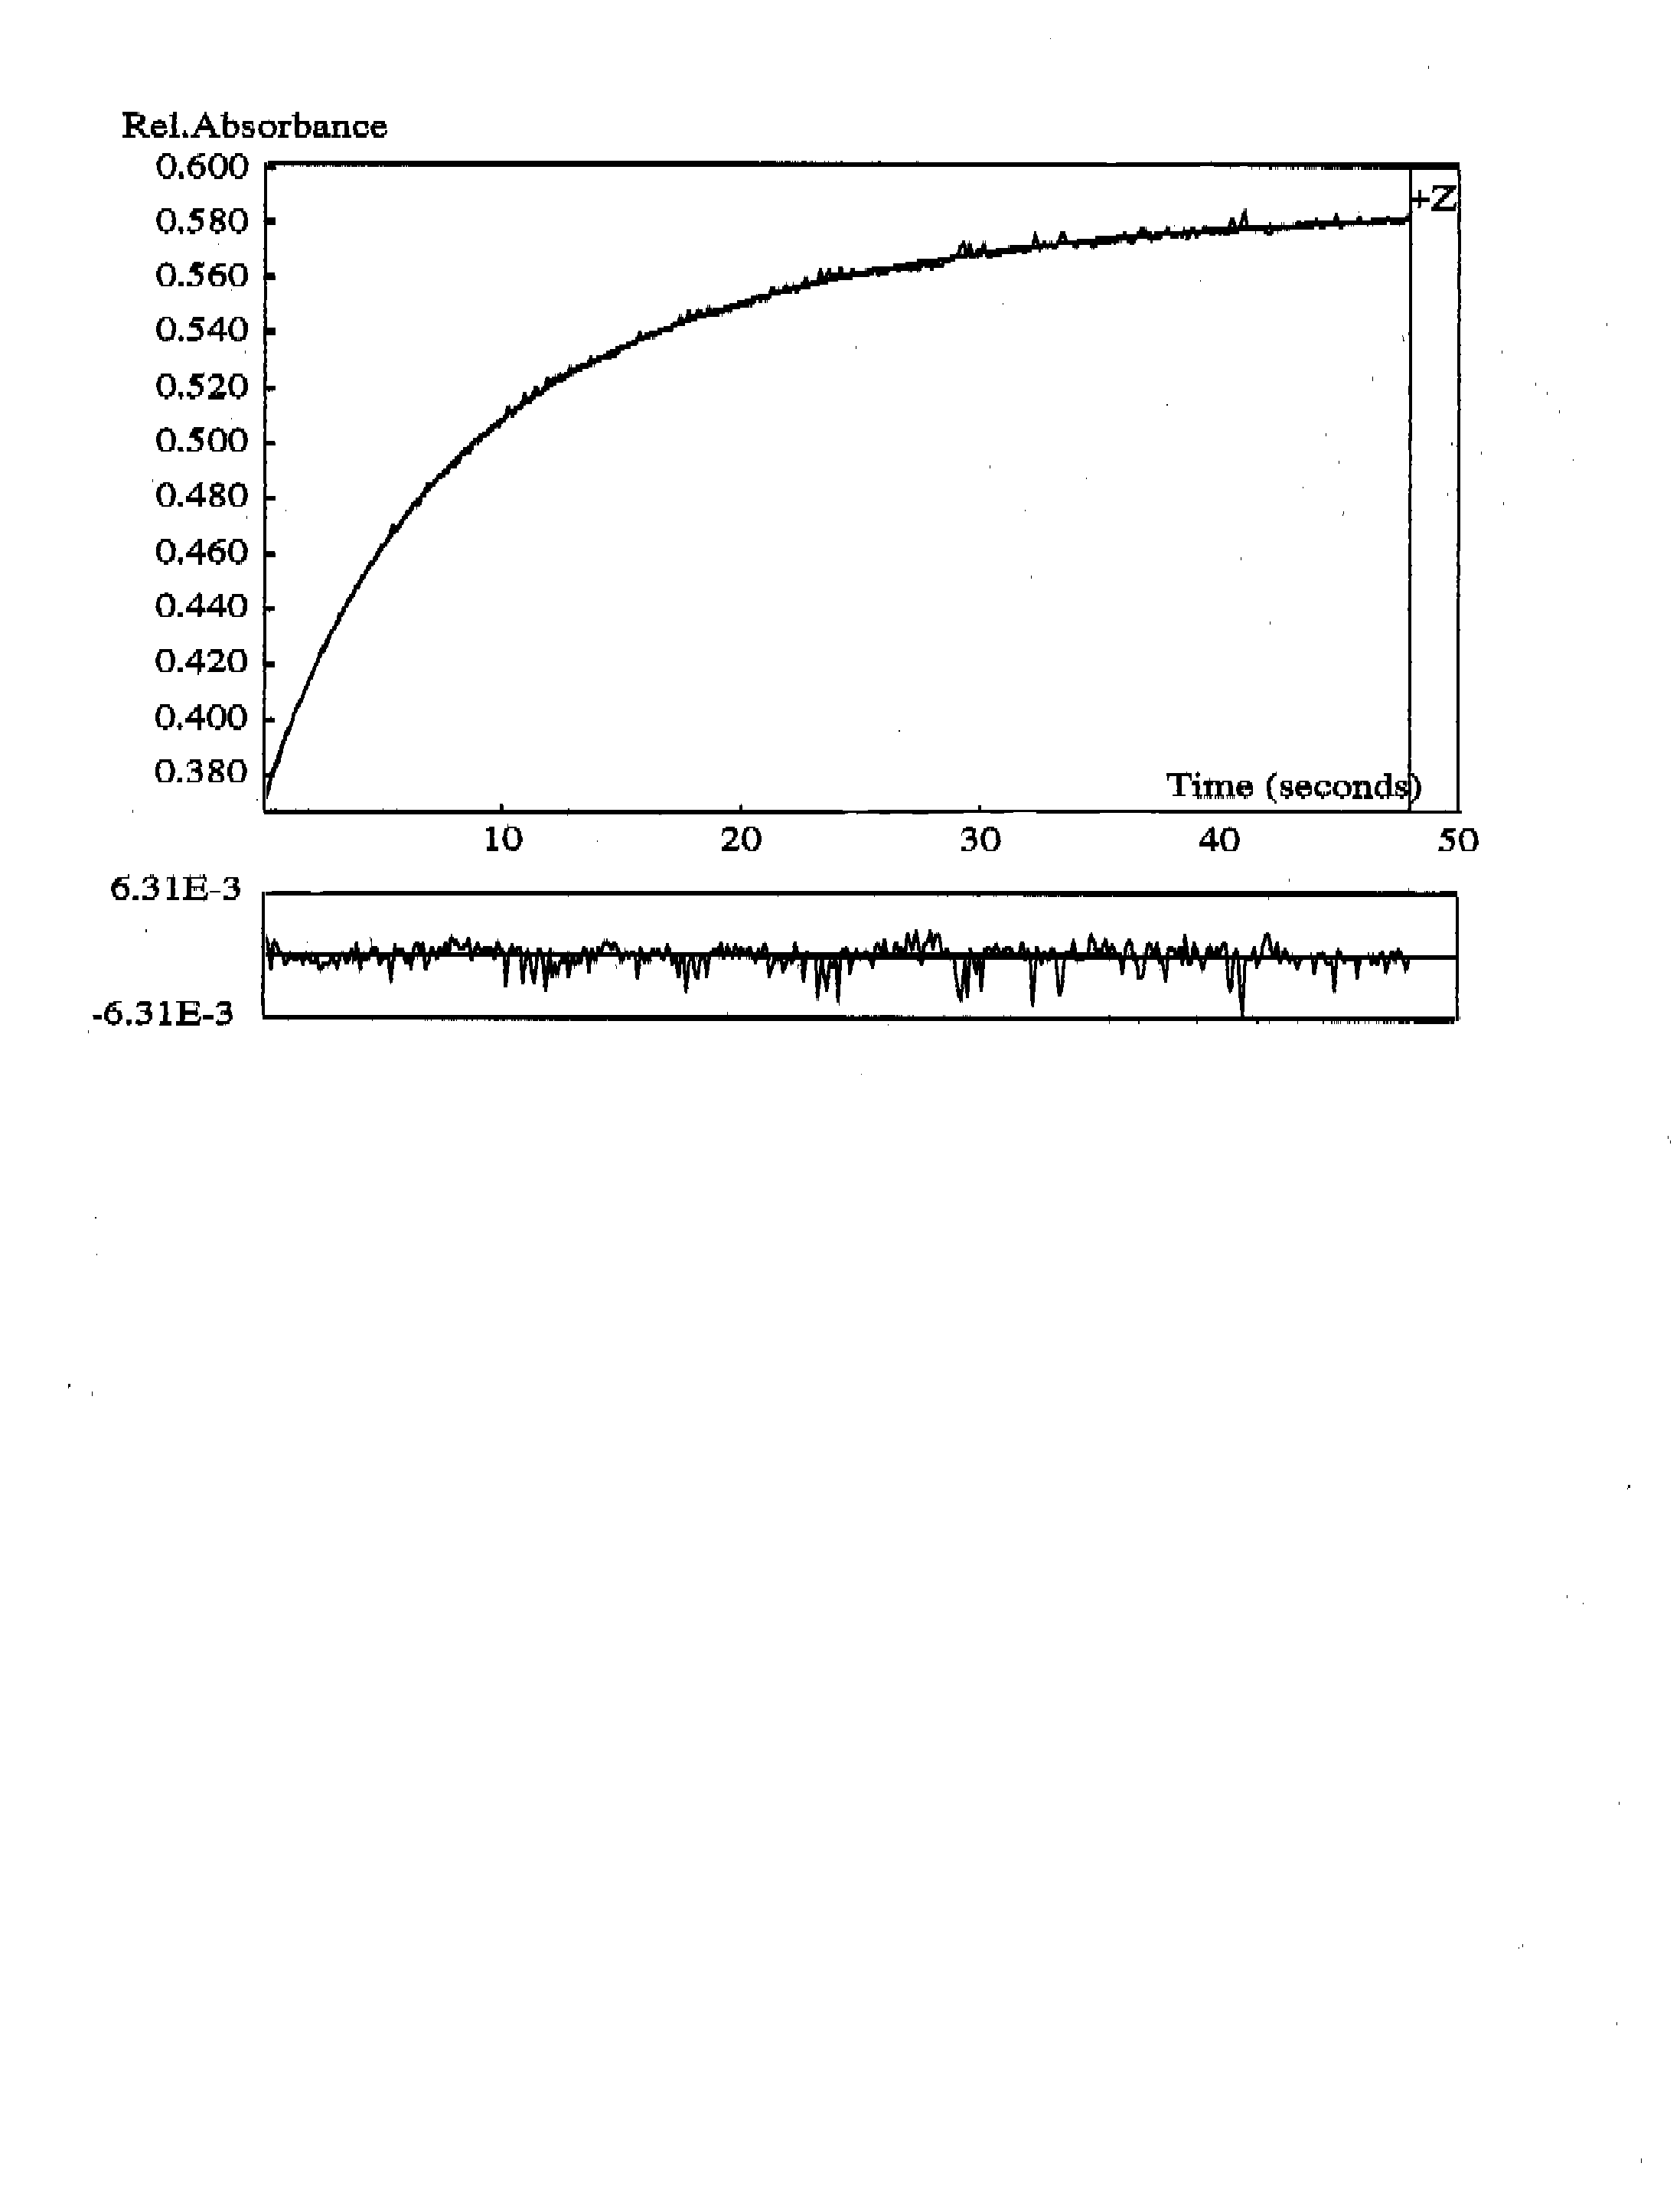


# Figure S4

# Figure S5

**Figure S6**

**Figure S7**

**Figure S8**

**Figure S9**

**Figure S10**
